# Supplementary material for: Credit Card Fraud Detection with Machine Learning and Big Data Analytics: A PySpark Framework Implementation
Source: Preprints.org preprint supplement (doi:10.20944/preprints202407.0022.v1), 2024-07-01
Supplement: Supplementary file 1 [file supplementary]

## Sheet: Sheet1
		id	1	-0.4	0.42	-0.66	0.62	-0.27	-0.39	-0.41	0.12	-0.51	-0.58	0.59	-0.65	-0.076	-0.71	-0.08	-0.49	-0.42	-0.34	0.22	0.15	0.098	0.036	0.018	-0.12	0.0056	0.052	0.18	0.087	0.0017	0.86
		V1	-0.4	1	-0.56	0.48	-0.5	0.52	0.35	0.57	-0.23	0.55	0.6	-0.53	0.58	-0.021	0.49	0.046	0.62	0.61	0.58	-0.38	-0.22	-0.035	-0.074	-0.069	-0.015	-0.0086	0.0093	-0.12	0.07	-0.0013	-0.51
		V2	0.42	-0.56	1	-0.63	0.58	-0.63	-0.34	-0.69	0.19	-0.59	-0.62	0.56	-0.57	0.013	-0.52	-0.16	-0.53	-0.5	-0.48	0.21	0.26	-0.014	0.035	0.15	-0.028	0.13	0.012	0.054	0.021	-7.6e-05	0.49
		V3	-0.66	0.48	-0.63	1	-0.69	0.51	0.51	0.63	-0.26	0.65	0.71	-0.69	0.71	-0.019	0.67	0.099	0.61	0.58	0.53	-0.31	-0.25	-0.022	-0.042	-0.059	0.076	-0.076	-0.052	-0.19	0.0053	0.0002	-0.68
		V4	0.62	-0.5	0.58	-0.69	1	-0.43	-0.47	-0.59	0.2	-0.68	-0.71	0.71	-0.72	0.012	-0.71	-0.099	-0.59	-0.53	-0.48	0.27	0.26	-0.013	0.091	0.043	-0.1	0.029	0.14	0.19	-0.011	0.0019	0.74
		V5	-0.27	0.52	-0.63	0.51	-0.43	1	0.25	0.59	-0.31	0.48	0.56	-0.44	0.47	-0.12	0.39	0.059	0.6	0.67	0.65	-0.44	-0.25	0.034	-0.12	-0.11	-0.083	-0.048	0.048	-0.044	0.11	-1.6e-05	-0.34
		V6	-0.39	0.35	-0.34	0.51	-0.47	0.25	1	0.42	-0.6	0.43	0.47	-0.5	0.5	-0.12	0.51	-0.024	0.42	0.38	0.33	-0.24	-0.19	-0.04	0.037	0.31	-0.0052	-0.2	-0.068	-0.26	-0.066	0.00073	-0.44
		V7	-0.41	0.57	-0.69	0.63	-0.59	0.59	0.42	1	-0.18	0.6	0.68	-0.59	0.6	-0.03	0.54	0.14	0.67	0.66	0.63	-0.37	-0.3	0.02	-0.1	-0.11	-0.0042	0.0008	-0.0065	-0.037	0.041	0.0013	-0.49
		V8	0.12	-0.23	0.19	-0.26	0.2	-0.31	-0.6	-0.18	1	-0.12	-0.2	0.22	-0.21	0.27	-0.22	0.1	-0.23	-0.28	-0.25	0.25	0.13	0.056	-0.099	-0.46	0.083	0.32	0.04	0.3	0.046	-0.00021	0.14
		V9	-0.51	0.55	-0.59	0.65	-0.68	0.48	0.43	0.6	-0.21	1	0.75	-0.63	0.67	-0.0062	0.63	0.11	0.57	0.58	0.52	-0.29	-0.33	0.13	-0.2	-0.042	0.044	-0.035	-0.13	-0.11	0.07	-0.0016	-0.59
		V10	-0.58	0.6	-0.62	0.71	-0.71	0.56	0.47	0.68	-0.2	0.75	1	-0.71	0.74	-0.019	0.7	0.11	0.69	0.65	0.6	-0.38	-0.29	0.037	-0.15	-0.056	0.046	-0.014	-0.054	-0.13	0.036	-0.0013	-0.67
		V11	0.59	-0.53	0.56	-0.69	0.71	-0.44	-0.5	-0.59	0.22	-0.63	-0.71	1	-0.74	0.015	-0.76	-0.058	-0.66	-0.6	-0.52	0.35	0.2	0.11	0.022	0.014	-0.1	0.052	0.13	0.29	0.06	0.00029	0.72
		V12	-0.65	0.58	-0.57	0.71	-0.72	0.47	0.5	0.6	-0.21	0.67	0.74	-0.74	1	0.018	0.78	0.041	0.7	0.66	0.58	-0.37	-0.22	-0.08	-0.072	-0.019	0.08	-0.01	-0.11	-0.22	-0.053	-0.0012	-0.77
		V13	-0.076	-0.021	0.013	-0.019	0.012	-0.12	-0.12	-0.03	0.27	-0.0062	-0.019	0.015	0.018	1	0.029	-0.016	-0.082	-0.12	-0.12	0.17	-0.0073	0.026	0.002	-0.12	0.06	0.0036	0.044	0.058	-0.1	-0.0027	-0.071
		V14	-0.71	0.49	-0.52	0.67	-0.71	0.39	0.51	0.54	-0.22	0.63	0.7	-0.76	0.78	0.029	1	0.01	0.63	0.55	0.47	-0.32	-0.15	-0.19	0.052	-0.0076	0.14	-0.087	-0.14	-0.3	-0.13	-0.0014	-0.81
		V15	-0.08	0.046	-0.16	0.099	-0.099	0.059	-0.0024	0.14	0.1	0.11	0.11	-0.058	0.041	-0.016	0.01	1	0.0014	0.032	0.017	0.19	-0.14	0.17	-0.099	-0.075	0.023	-0.028	0.048	0.12	0.1	0.00012	-0.038
		V16	-0.49	0.62	-0.53	0.61	-0.59	0.6	0.42	0.67	-0.23	0.57	0.69	-0.66	0.7	-0.082	0.63	0.0014	1	0.85	0.77	-0.59	-0.22	-0.12	-0.1	-0.057	-0.024	0.062	-0.056	-0.19	-0.022	-0.00048	-0.57
		V17	-0.42	0.61	-0.5	0.58	-0.53	0.67	0.38	0.66	-0.28	0.58	0.65	-0.6	0.66	-0.12	0.55	0.032	0.85	1	0.85	-0.61	-0.22	-0.079	-0.14	-0.045	-0.072	0.076	-0.045	-0.18	0.02	-0.00036	-0.48
		V18	-0.34	0.58	-0.48	0.53	-0.48	0.65	0.33	0.63	-0.25	0.52	0.6	-0.52	0.58	-0.12	0.47	0.017	0.77	0.85	1	-0.57	-0.19	-0.061	-0.14	-0.046	-0.1	0.07	-0.021	-0.14	0.053	-0.0015	-0.41
		V19	0.22	-0.38	0.21	-0.31	0.27	-0.44	-0.24	-0.37	0.25	-0.29	-0.38	0.35	-0.37	0.17	-0.32	0.19	-0.59	-0.61	-0.57	1	0.072	0.14	0.11	-0.0015	0.11	-0.17	0.041	0.12	-0.024	-0.0004	0.24
		V20	0.15	-0.22	0.26	-0.25	0.26	-0.25	-0.19	-0.3	0.13	-0.33	-0.29	0.2	-0.22	0.0073	-0.15	-0.14	-0.22	-0.22	-0.19	0.072	1	-0.53	0.43	0.017	-0.02	0.03	0.0077	-0.055	-0.03	-0.0014	0.18
		V21	0.098	-0.035	-0.014	-0.022	-0.013	0.034	-0.04	0.02	0.056	0.13	0.037	0.11	-0.08	0.026	-0.19	0.17	-0.12	-0.079	-0.061	0.14	-0.53	1	-0.73	0.097	-0.059	0.15	0.07	0.37	0.33	0.001	0.11
		V22	0.036	-0.074	0.035	-0.042	0.091	-0.12	0.037	-0.1	-0.099	-0.2	-0.15	0.022	-0.072	0.002	0.052	-0.099	-0.1	-0.14	-0.14	0.11	0.43	-0.73	1	-0.00064	0.08	-0.26	-0.015	-0.34	-0.28	-0.00094	0.014
		V23	0.018	-0.069	0.15	-0.059	0.043	-0.11	0.31	-0.11	-0.46	-0.042	-0.056	0.014	-0.019	-0.12	-0.0076	-0.075	-0.057	-0.045	-0.046	-0.0015	0.017	0.097	-0.00064	1	-0.051	-0.041	0.0011	-0.15	0.028	-0.002	0.01
		V24	-0.12	-0.015	-0.028	0.076	-0.1	-0.083	0.0052	-0.0042	0.083	0.044	0.046	-0.1	0.08	0.06	0.14	0.023	-0.024	-0.072	-0.1	0.11	-0.02	-0.059	0.08	-0.051	1	-0.08	-0.11	-0.19	-0.045	-0.00085	-0.13
		V25	0.005	0.0085	0.13	-0.076	0.029	-0.048	-0.2	0.0008	0.32	-0.035	-0.014	0.052	-0.01	0.0036	-0.087	-0.028	0.062	0.076	0.07	-0.17	0.03	0.15	-0.26	-0.041	-0.08	1	0.058	0.22	0.18	-0.00072	0.062
		V26	0.052	0.0093	0.012	-0.052	0.14	0.048	-0.068	0.0065	0.04	-0.13	-0.054	0.13	-0.11	0.044	-0.14	0.048	-0.056	-0.045	-0.021	0.041	0.0077	0.07	-0.015	0.0011	-0.11	0.058	1	0.19	0.03	-0.00012	0.071
		V27	0.18	-0.12	0.054	-0.19	0.19	-0.044	-0.26	-0.037	0.3	-0.11	-0.13	0.29	-0.22	0.058	-0.3	0.12	-0.19	-0.18	-0.14	0.12	-0.055	0.37	-0.34	-0.15	-0.19	0.22	0.19	1	0.18	0.0012	0.21
		V28	0.087	0.07	0.021	0.0053	0.011	0.11	-0.066	0.041	0.046	0.07	0.036	0.06	-0.053	-0.1	-0.13	0.1	-0.022	0.02	0.053	-0.024	-0.036	0.33	-0.28	0.028	-0.045	0.18	0.037	0.18	1	-0.0015	0.1
		Amount	0.001	-0.0017	-3.6e-05	-0.002	0.0011	-1.6e-05	0.0073	0.0013	-0.00021	-0.0016	-0.0013	0.00029	-0.0012	-0.0027	-0.0014	0.0012	-0.00048	0.00036	0.0016	-0.0004	0.0014	0.001	0.00094	-0.002	-0.00065	-0.00072	-0.00012	0.0012	-0.0015	1	0.0023
		Class	0.86	-0.51	0.49	-0.68	0.74	-0.34	-0.44	-0.49	0.14	-0.59	-0.67	0.72	-0.77	-0.071	-0.81	-0.038	-0.57	-0.48	-0.41	0.24	0.18	0.11	0.014	0.01	-0.13	0.062	0.071	0.21	0.1	0.0023	1
			id	V1	V2	V3	V4	V5	V6	V7	V8	V9	V10	V11	V12	V13	V14	V15	V16	V17	V18	V19	V20	V21	V22	V23	V24	V25	V26	V27	V28	Amount	Class
